# Supplementary material for: Phytochemical Analysis, α-Glucosidase and α-Amylase Inhibitory Activities and Acute Toxicity Studies of Extracts from Pomegranate (Punica granatum) Bark, a Valuable Agro-Industrial By-Product
Source: MDPI journal article supplement (doi:10.3390/foods11091353), 2022-05-06
Supplement: s1 [file s1]

*Supplementary Materials*

## **Phytochemical Analysis, $\alpha$ -Glucosidase and $\alpha$ -Amylase Inhibitory Activities and Acute Toxicity Studies of Extracts from Pomegranate (*Punica granatum*) Bark, a Valuable Agro-Industrial By-Product**

Nassima Laaraj <sup>1</sup>, Mohamed Bouhrim <sup>2</sup>, Loubna Kharchoufa <sup>2</sup>, Salima Tiji <sup>1</sup>, Hasna Bendaha<sup>1</sup>, Mohamed Addi <sup>3</sup>, Samantha Drouet <sup>4</sup>, Christophe Hano <sup>4\*</sup>, Jose Manuel Lorenzo <sup>5,6</sup>, Mohamed Bnouham <sup>2</sup> and Mostafa Mimouni <sup>1,\*</sup>

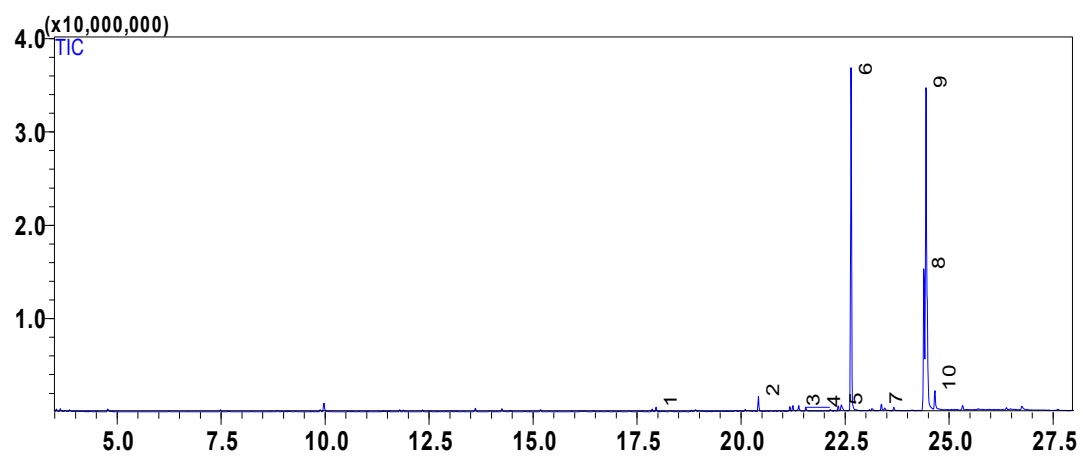

**Figure S1:** Chromatogram of the defatted hexane fraction (HEE) of pomegranate bark by GC-MS.

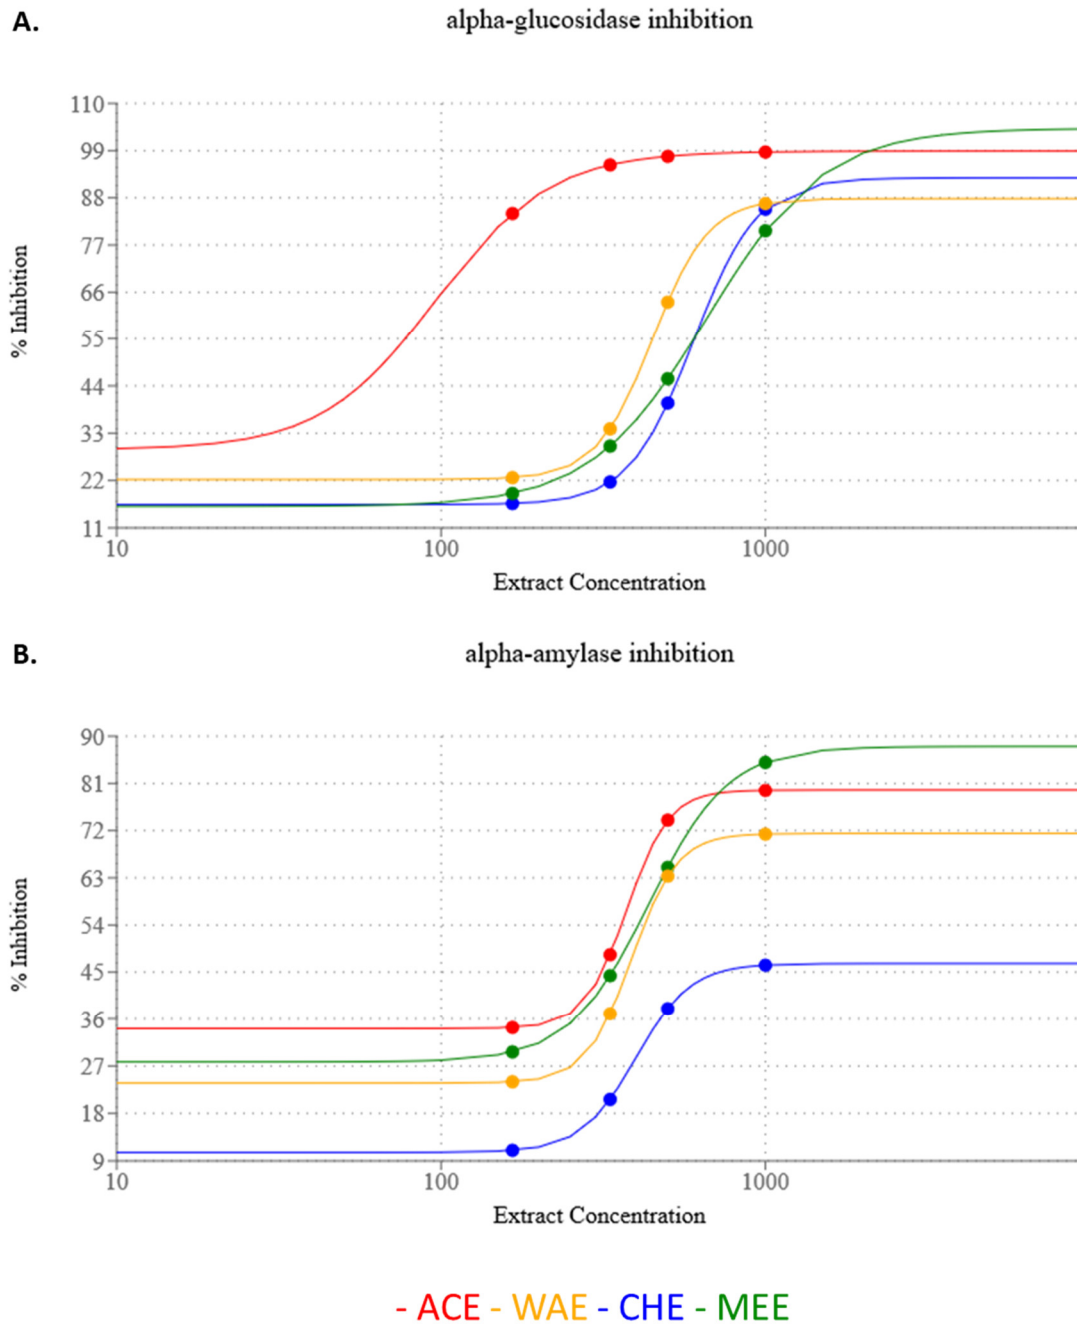

**Figure S2:** IC<sub>50</sub> curves for inhibition of (A) intestinal  $\alpha$ -amylase and (B) pancreatic  $\alpha$ -amylase by pomegranate (*Punica granatum*) acetone (ACE), water (WAE), chloroform (CHE) and methanol (MEE) bark extracts. Each experiment was done in triplicate.

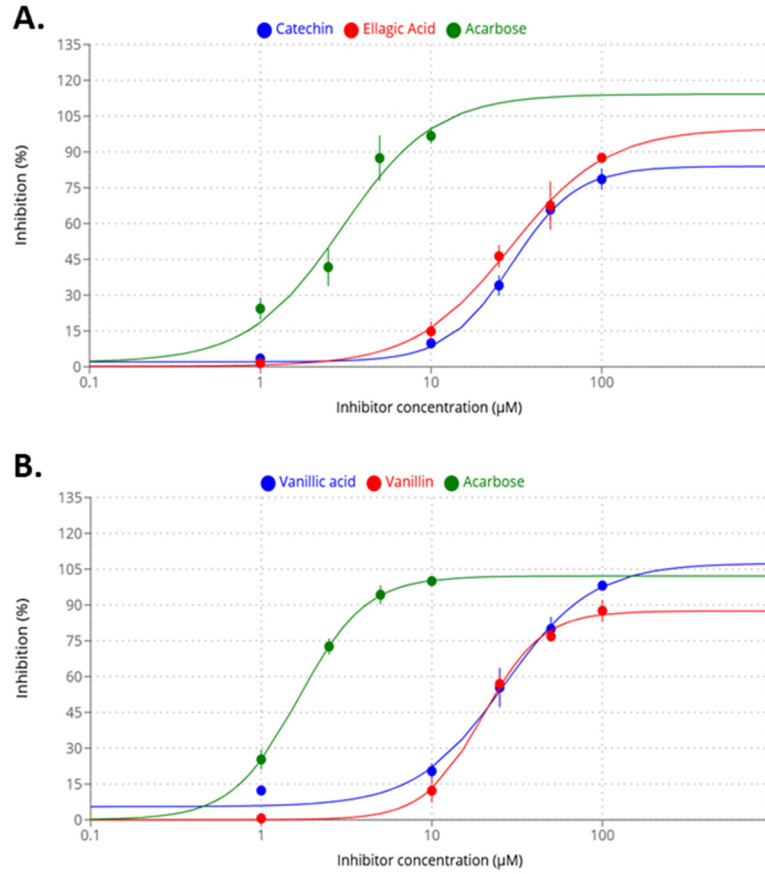

**Figure S3:**  $IC_{50}$  curves (without background correction (subtract smallest response) to show error bars) for inhibition of (A) intestinal  $\alpha$ -amylase by acarbose, (-)-catechin and ellagic acid, and of (B) pancreatic  $\alpha$ -amylase by acarbose, vanillic acid and vanillin. Each experiment was done in triplicate.

**Table S1:** Chemical composition percentage (%Area) identified in the defatted hexane fraction (HEE) by GC-MS.

| Pic<br>Number | Name                 | Retention time (mn)<br>(RT) | %Area |
|---------------|----------------------|-----------------------------|-------|
| 1             | Lauric acid          | 17.992                      | 0.32  |
| 2             | Myristic acid        | 20.542                      | 1.40  |
| 3             | Tetracosane          | 21.308                      | 0.63  |
| 4             | 6-Octadecenoic acid, | 21.467                      | 0.79  |
| 5             | 7-Hexadecenoic acid  | 22.517                      | 1.08  |
| 6             | Palmitic acid,       | 24.333                      | 31.72 |
| 7             | 10-Methylicosane     | 23.417                      | 0.67  |
| 8             | Linoleic acid,       | 24.417                      | 14.37 |
| 9             | Oleic acid           | 27.958                      | 46.97 |
| 10            | Stearic acid         | 24.842                      | 2.05  |
